# Supplementary material for: Reversal of dual epigenetic repression of non-canonical Wnt-5a normalises diabetic corneal epithelial wound healing and stem cells
Source: PubMed Central journal article supplement (PMC10474199; doi:10.1007/s00125-023-05960-1), 2023-07-18
Supplement: 125_2023_5960_MOESM1_ESM.pdf [file 125_2023_5960_MOESM1_ESM.pdf]

## Electronic Supplementary Materials (ESM)

**ESM Table 1.** Non-diabetic and diabetic donor characteristics

| Case #   | Age (years) | Sex | DM Type | Duration (years) | Cause of Death                                               | DM medications | Used for                     |
|----------|-------------|-----|---------|------------------|--------------------------------------------------------------|----------------|------------------------------|
| N09-18   | 75          | M   | N/A     | N/A              | Respiratory failure                                          | N/A            | Organ culture                |
| N10-08-1 | 62          | M   | N/A     | N/A              | Cardiac arrest                                               | N/A            | DNA methylation              |
| N10-18   | 67          | M   | N/A     | N/A              | Stroke                                                       | N/A            | <i>Ex vivo</i>               |
| N10-21   | 79          | M   | N/A     | N/A              | Stroke                                                       | N/A            | <i>Ex vivo</i>               |
| N13-01   | 78          | F   | N/A     | N/A              | Heart disease                                                | N/A            | LEC culture                  |
| N13-21   | 20          | M   | N/A     | N/A              | Asphyxiation                                                 | N/A            | LEC culture, DNA methylation |
| N13-38-1 | 27          | M   | N/A     | N/A              | Respiratory failure                                          | N/A            | LEC culture, DNA methylation |
| N14-01   | 86          | F   | N/A     | N/A              | COPD                                                         | N/A            | LEC culture                  |
| N14-02   | 65          | M   | N/A     | N/A              | Unknown                                                      | N/A            | LEC culture                  |
| N16-12   | 86          | F   | N/A     | N/A              | Stroke / CVA                                                 | N/A            | LEC culture, DNA methylation |
| N16-14   | 76          | F   | N/A     | N/A              | Cardiac/pulmonary failure                                    | N/A            | LEC culture, DNA methylation |
| N16-18   | 64          | M   | N/A     | N/A              | Lung cancer                                                  | N/A            | LEC culture                  |
| N17-32   | 36          | F   | N/A     | N/A              | Metastatic cardiac angiosarcoma                              | N/A            | LEC culture                  |
| N17-46   | 23          | M   | N/A     | N/A              | MBF injuries to head and neck 2 <sup>nd</sup> to MVA         | N/A            | LEC culture                  |
| N18-20   | 70          | M   | N/A     | N/A              | Respiratory failure                                          | N/A            | <i>Ex vivo</i>               |
| N18-26   | 73          | M   | N/A     | N/A              | Myocardial infarction                                        | N/A            | <i>Ex vivo</i>               |
| N18-28   | 32          | M   | N/A     | N/A              | Ligature hanging                                             | N/A            | LEC culture                  |
| N18-32   | 31          | M   | N/A     | N/A              | Multiple vehicular blunt force injuries of head, neck, torso | N/A            | LEC culture                  |
| N19-21   | 76          | F   | N/A     | N/A              | Anoxic brain injury post code                                | N/A            | LEC culture                  |
| N19-22   | 66          | F   | N/A     | N/A              | Respiratory failure                                          | N/A            | LEC culture                  |
| N19-23   | 55          | F   | N/A     | N/A              | Myocardial infarction                                        | N/A            | LEC culture                  |
| N19-25   | 58          | M   | N/A     | N/A              | Metastatic lung cancer                                       | N/A            | LEC culture                  |

|         |    |   |       |         |                                                     |                                                                  |                                    |
|---------|----|---|-------|---------|-----------------------------------------------------|------------------------------------------------------------------|------------------------------------|
| N19-51  | 72 | F | N/A   | N/A     | AAA dissection                                      | N/A                                                              | Organ culture                      |
| DR13-13 | 78 | M | NIDDM | 31      | Respiratory failure                                 | Glyburide,<br>Humalog,<br>Lantus                                 | LEC culture                        |
| DR10-15 | 70 | M | NIDDM | 40      | Subarachnoid<br>hemorrhage                          | Novalin N,<br>Novalin R                                          | <i>Ex vivo</i>                     |
| DR10-16 | 63 | M | NIDDM | 10      | Aspiration<br>pneumonia                             | Unknown                                                          | <i>Ex vivo</i>                     |
| DM13-02 | 91 | M | NIDDM | 6       | Pneumonia                                           | Unknown                                                          | LEC culture,<br>DNA<br>methylation |
| DM13-03 | 63 | F | NIDDM | Unknown | Respiratory failure                                 | Insulin,<br>Glucophage,<br>Glucagen                              | LEC culture,<br>DNA<br>methylation |
| DM13-04 | 67 | M | IDDM  | 13      | Coronary artery<br>disease                          | Lantus                                                           | LEC culture,<br>DNA<br>methylation |
| DR13-15 | 54 | M | IDDM  | 46      | Acute renal failure                                 | Humalog                                                          | DNA<br>methylation                 |
| DM14-35 | 62 | F | NIDDM | 30      | Multisystem organ<br>failure                        | Metformin                                                        | LEC culture                        |
| DM14-41 | 67 | M | NIDDM | 21      | Possible myocardial<br>infarction                   | Unknown                                                          | LEC culture                        |
| DM14-43 | 73 | F | NIDDM | 10      | Congestive heart<br>failure, acute renal<br>failure | Unknown                                                          | LEC culture                        |
| DM15-04 | 81 | M | NIDDM | 20      | Congestive heart<br>failure                         | Insulin                                                          | LEC culture                        |
| DM15-14 | 60 | M | NIDDM | 25      | Pancreatic cancer                                   | Unknown                                                          | LEC culture                        |
| DM16-27 | 71 | F | NIDDM | 15      | Cardiac                                             | Insulin                                                          | LEC culture                        |
| DM16-28 | 88 | F | NIDDM | 40      | Cardiac arrest                                      | Oral DM meds                                                     | LEC culture,<br>DNA<br>methylation |
| DM17-39 | 86 | F | IDDM  | 25      | Cardiac arrest                                      | Unknown                                                          | LEC culture                        |
| DM18-17 | 79 | F | NIDDM | 10      | Cardiac arrest                                      | Unknown                                                          | <i>Ex vivo</i>                     |
| DM18-21 | 73 | F | NIDDM | 15      | Respiratory failure                                 | DM oral<br>medication for<br>13 years,<br>insulin for 2<br>years | <i>Ex vivo</i>                     |
| DM19-28 | 79 | M | NIDDM | 15      | Cardiac arrest                                      | Unknown                                                          | LEC culture,<br><i>ex vivo</i>     |
| DM19-42 | 73 | M | NIDDM | 5       | Cardiac arrest                                      | Insulin,<br>Metformin,                                           | Organ culture                      |

|         |    |   |       |         |                           |                                                     |               |
|---------|----|---|-------|---------|---------------------------|-----------------------------------------------------|---------------|
| DM19-48 | 66 | M | NIDDM | 30      | CAD                       | Insulin,<br>Glipizide,<br>Insulin<br>Aspart/Detemir | Organ culture |
| DM19-50 | 75 | M | NIDDM | 10      | Cardiac arrest            | Unknown                                             | Organ culture |
| DM20-09 | 80 | M | NIDDM | 16      | Cardiopulmonary<br>arrest | Lantus                                              | Organ culture |
| DR21-18 | 64 | F | NIDDM | 15      | Acute cardiac event       | Anti-diabetic<br>meds, insulin                      | Organ culture |
| DM21-20 | 77 | M | NIDDM | 15      | Acute cardiac event       | Toujeo,<br>Trulicity,<br>Novolin                    | Organ culture |
| DM21-21 | 86 | M | NIDDM | 20      | Basal cell carcinoma      | Unknown                                             | Organ culture |
| DM21-22 | 61 | F | NIDDM | Unknown | Myocardial infarction     | Unknown<br>(Poorly<br>controlled DM)                | Organ culture |
| DM21-30 | 68 | M | NIDDM | 20      | Renal failure             | Unknown                                             | Organ culture |
| DM21-31 | 60 | M | IDDM  | 25      | Myocardial infarction     | Insulin                                             | Organ culture |
| DM22-02 | 69 | F | IDDM  | 50      | Sepsis                    | Unknown                                             | Organ culture |
| DM22-14 | 74 | F | NIDDM | 5       | Respiratory failure       | Insulin Lispro                                      | Organ culture |

Abbreviations: N, non-diabetic; DM, diabetic; DR, with documented diabetic retinopathy; IDDM, insulin-dependent diabetes mellitus (type 1); NIDDM, non-insulin-dependent diabetes mellitus (type 2); F, female; M, male; N/A, not applicable.

**ESM Table 2.** Characterisation of NBC

| <b>Parameter</b>              | <b>Control</b>                          | <b>Therapeutic</b>                      |
|-------------------------------|-----------------------------------------|-----------------------------------------|
| Structure                     | PMLA/LLL/OKT-9/Control AON/<br>Alexa488 | PMLA/LLL/OKT-9/miR-203 AON/<br>Alexa488 |
| Polymer molecular<br>mass     | 85 kDa                                  | 85 kDa                                  |
| AlexaFluor, $\mu\text{mol/l}$ | 20.83                                   | 19.4                                    |
| a-TfR OKT-9 mAb, %            | 0.2%                                    | 0.2%                                    |
| AON, $\mu\text{mol/l}$        | 100                                     | 90                                      |
| $\zeta$ -potential (mV)       | $-11.8 \pm 0.2$                         | $-12.7 \pm 0.9$                         |

Abbreviations: PMLA, polymalic acid; AON, antisense oligonucleotide; TfR, transferrin receptor; mAb, monoclonal antibody.

**ESM Table 3.** List of antibodies used

| <b>Antigen</b>                | <b>Antibody</b> | <b>Source</b>                                       | <b>Dilution</b> | <b>Application</b> |
|-------------------------------|-----------------|-----------------------------------------------------|-----------------|--------------------|
| Active caspase-3              | Rabbit pAb      | 559565, BD Pharmingen (Franklin Lakes, NJ)          | 1:100           | IHC                |
| $\beta$ -Actin                | Mouse mAb       | A5316, Sigma-Aldrich (St. Louis, MO)                | 1:2000          | WB                 |
| $\beta$ -Actin                | Mouse mAb       | A5441, Sigma-Aldrich                                | 1:2000          | WB                 |
| $\beta$ -Actin                | Rabbit mAb      | 8457, Cell Signaling Technology (Danvers, MA)       | 1:1000          | WB                 |
| 5-methylcytosine              | Mouse mAb       | ab10805, Abcam (Waltham, MA)                        | 1:50            | IHC                |
| DNMT1                         | Rabbit mAb      | 5032S, Cell Signaling Technology                    | 1:1000          | WB                 |
| DNMT1                         | Rabbit pAb      | ab19905, Abcam                                      | 1:50            | IHC                |
| Keratin 15                    | Mouse mAb       | sc-47697, Santa Cruz Biotechnology (Santa Cruz, CA) | 1:10, 1:50      | IHC                |
| Keratin 15                    | Rabbit mAb      | ab52816, Abcam                                      | 1:2000          | WB                 |
| Keratin 17                    | Mouse mAb       | sc-58726, Santa Cruz Biotechnology                  | 1:3, 1:50       | IHC                |
| Ki67                          | Mouse mAb       | sc-101861, Santa Cruz Biotechnology                 | 1:10            | IHC                |
| Nidogen-1                     | Mouse mAb       | MAB2570, R&D Systems (Minneapolis, MN)              | 1:10            | IHC                |
| Integrin $\alpha$ 3 $\beta$ 1 | Mouse mAb       | MAB1992, EMD Millipore (Billerica, MA)              | 1:100           | IHC                |
| p-Akt (S473)                  | Rabbit pAb      | 9271, Cell Signaling Technology                     | 1:50            | IHC                |
| p-ERK1/2 (T185/Y187)          | Rabbit pAb      | ab4819, Abcam                                       | 1:50            | IHC                |
| p-p38 (T180/Y182)             | Rabbit mAb      | 05-1059, EMD Millipore                              | 1:50            | IHC                |
| Wnt-3a                        | Rabbit pAb      | ab28472, Abcam                                      | 1:50            | IHC                |
| Wnt-3a                        | Rabbit mAb      | 703666, Thermo Fisher (Carlsbad, CA)                | 1:25            | IHC                |
| Wnt-5a                        | Rabbit mAb      | ab179824, Abcam                                     | 1:500, 1:5000   | IHC, WB            |
| Wnt-5a                        | Mouse mAb       | MAB10373, Abnova (Taipei, Taiwan)                   | 1:200           | IHC                |
| Wnt-5a                        | Mouse mAb       | H00007474-M04, Abnova                               | 1:50            | IHC                |
| Wnt-11                        | Rabbit pAb      | PA5-21712, Thermo Fisher                            | 1:50            | IHC                |
| Wnt-11                        | Rabbit pAb      | ab31962, Abcam                                      | 1:50            | IHC                |

Abbreviations: mAb, monoclonal antibody; pAb, polyclonal antibody; WB, Western blot; IHC, immunohistochemistry. Primary antibodies were diluted in Tris-buffered saline with 0.1% Tween-20 (for WB) and phosphate-buffered saline (for IHC).

**ESM Table 4.** Protein expression changes after various treatments in organ-cultured diabetic corneas

| <b>Marker changes after Wnt-5a treatment of organ-cultured diabetic corneas</b>     |                |                |                |                |                                                                       |
|-------------------------------------------------------------------------------------|----------------|----------------|----------------|----------------|-----------------------------------------------------------------------|
| <b>Marker</b>                                                                       | <b>DM19-42</b> | <b>DM19-48</b> | <b>DM19-50</b> | <b>DM20-09</b> | <b>Number of independent cases with expression change vs. control</b> |
| K15                                                                                 | +              | +              | +              | +              | 4/4                                                                   |
| K17                                                                                 | +              | +              | +              | +              | 4/4                                                                   |
| Integrin $\alpha 3\beta 1$                                                          | +              | +              | +              | +              | 4/4                                                                   |
| Nidogen-1                                                                           | +              | +              | +              | +              | 4/4                                                                   |
| <b>Marker changes after zebularine treatment of organ-cultured diabetic corneas</b> |                |                |                |                |                                                                       |
| <b>Marker</b>                                                                       | <b>DM21-18</b> | <b>DM21-20</b> | <b>DM22-21</b> | <b>DM22-14</b> | <b>Number of independent cases with expression change vs. control</b> |
| DNMT1                                                                               | +              | n/a            | +              | +              | 3/3                                                                   |
| Wnt-5a                                                                              | +              | n/a            | +              | +              | 3/3                                                                   |
| K15                                                                                 | +              | n/a            | +              | +              | 3/3                                                                   |
| K17                                                                                 | +              | n/a            | +              | +              | 3/3                                                                   |
| Integrin $\alpha 3\beta 1$                                                          | +              | n/a            | -              | +              | 2/3                                                                   |
| Nidogen-1                                                                           | +              | n/a            | +              | +              | 3/3                                                                   |
| <b>Marker changes after NBC treatment of organ-cultured diabetic corneas</b>        |                |                |                |                |                                                                       |
| <b>Marker</b>                                                                       | <b>DM21-22</b> | <b>DM21-30</b> | <b>DM21-31</b> | <b>DM22-02</b> | <b>Number of independent cases with expression change vs. control</b> |
| Wnt-5a                                                                              | +              | +              | +              | +              | 4/4                                                                   |
| K15                                                                                 | +              | +              | -              | +              | 3/4                                                                   |
| K17                                                                                 | +              | +              | -              | +              | 3/4                                                                   |
| Integrin $\alpha 3\beta 1$                                                          | +              | +              | -              | +              | 3/4                                                                   |
| Nidogen-1                                                                           | +              | -              | +              | +              | 3/4                                                                   |

+, increased expression; -, no change.

**ESM Table 5.** Wnt-5a dependent activation/phosphorylation of wound healing mediators in non-diabetic and diabetic LEC

| Wound healing mediator  | Non-diabetic |        | Diabetic |        |
|-------------------------|--------------|--------|----------|--------|
|                         | Control      | Wnt-5a | Control  | Wnt-5a |
| p-Akt (S124)/Akt        | 1            | 0.89   | 1        | 1.63   |
| p-Akt (S473)/Akt        | 1            | 0.76   | 1        | 1.21   |
| p-ERK3 (S189)/ERK3      | 1            | 0.70   | 1        | 1.30   |
| p-ERK8 (T175/Y177)/ERK8 | 1            | 0.75   | 1        | 1.72   |
| p-TAK1 (S439)/TAK1      | 1            | 1.03   | 1        | 1.97   |
| p-Src (S75)/Src         | 1            | 0.96   | 1        | 1.32   |

Data from Wnt phospho arrays are shown. Treatment was with 200 ng/mL recombinant Wnt-5a. Numbers are fold changes of activated signaling mediator vs. respective total mediator.

a

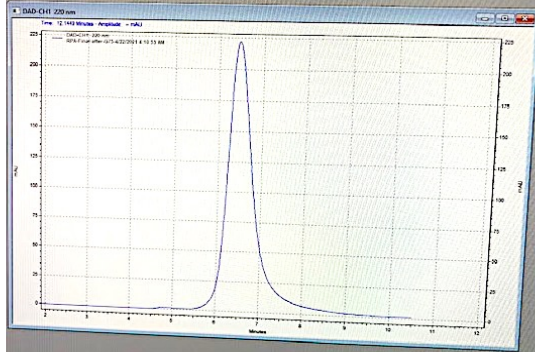

PMLA/LLL/OKT-9/Control  
AON/Alexa488

b

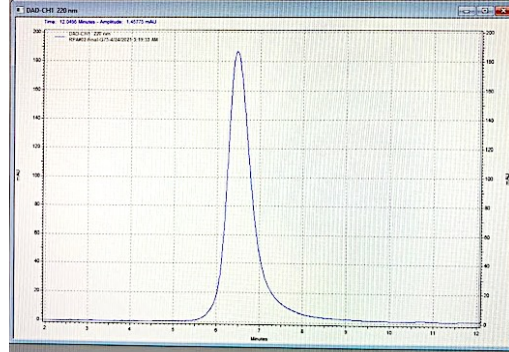

PMLA/LLL/OKT-9/miR203  
AON/Alexa488

**ESM Figure 1. SEC-HPLC analysis of nanoconjugates.** (a) PMLA/LLL/OKT-9/Control AON/Alexa488 and (b) PMLA/LLL/OKT-9/miR203 AON/Alexa488. HPLC pump: Hitachi L-2130; detector, Hitachi L-2455; software, EZChrome; Column, Polysep 4000; flow rate: 1mL/min; buffer, PBS.



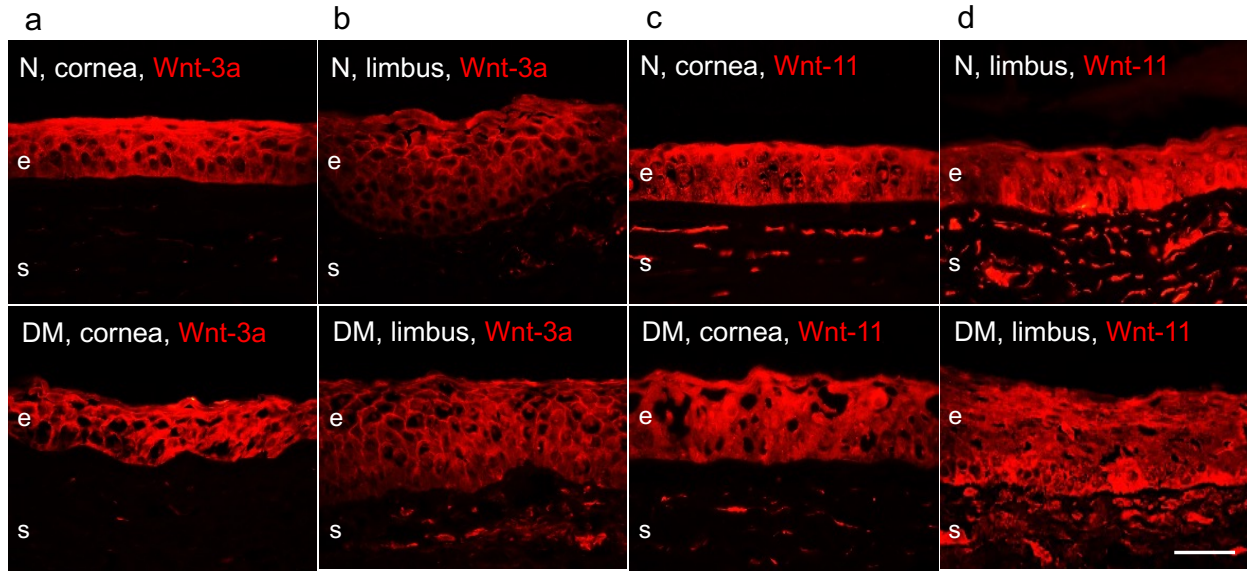

**ESM Figure 2. Immunostaining of canonical Wnt-3a and non-canonical Wnt-11 in *ex vivo* human non-diabetic and diabetic corneal sections.** Wnt-3a in (a) central cornea and (b) limbus, and Wnt-11 in (c) central cornea and (d) limbus in *ex vivo* non-diabetic and diabetic sections. Both components show no change in diabetic corneas. N, non-diabetic; DM, diabetic. e, epithelium; s, stroma. Scale bar, 20  $\mu\text{m}$ .

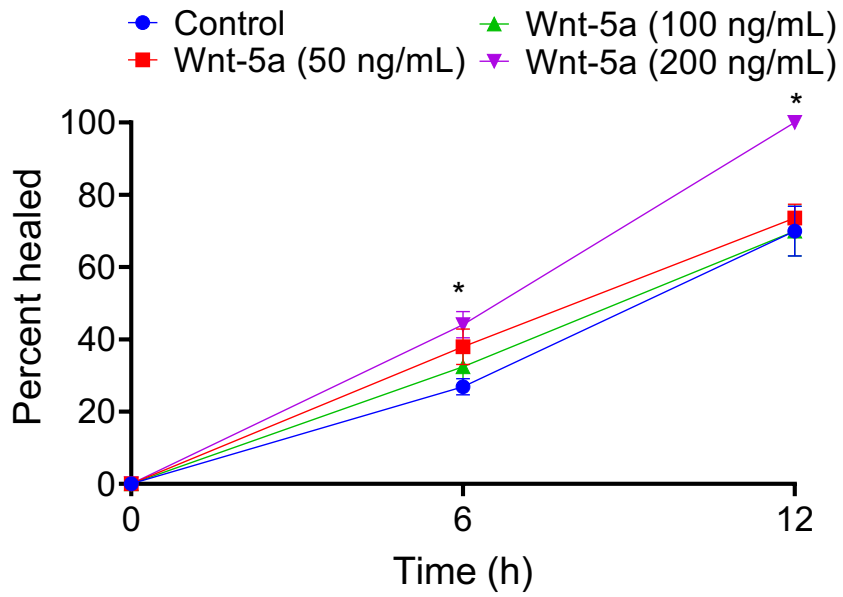

**ESM Figure 3. Dose-dependent stimulation of scratch wound healing in diabetic LEC by recombinant human Wnt-5a.** Values are mean  $\pm$  SEM. \*,  $p < 0.05$  vs. control at the same time point. Paired  $t$ -test. Number of independent cases  $n=3$ .

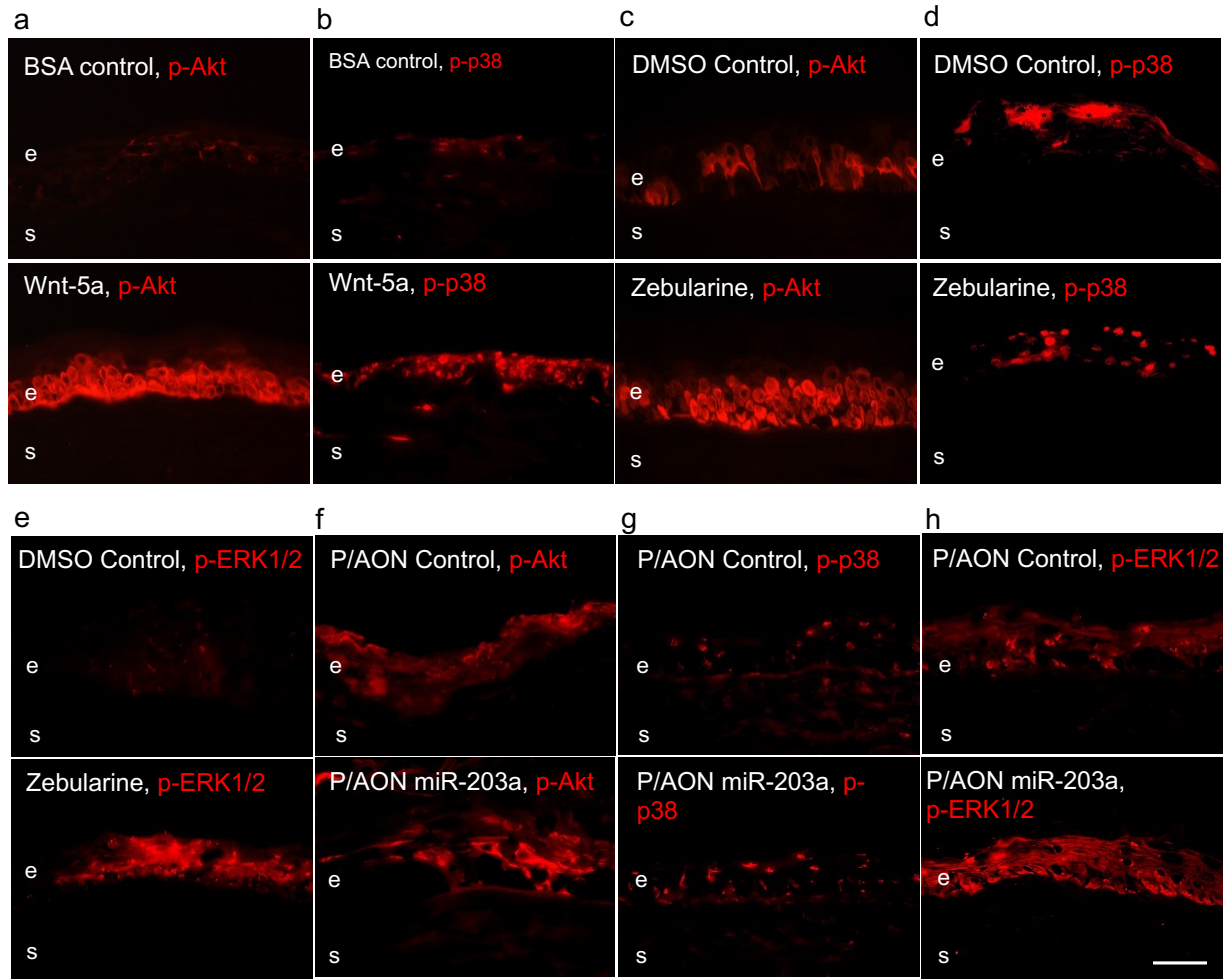

**ESM Figure 4. Immunostaining for activated signaling intermediates p-Akt (S473), p-p38 (T180/Y182), and p-ERK1/2 (T185/Y187) in diabetic organ-cultured corneas.** Corneas were treated with Wnt-5a (200 ng/mL) or BSA control (a, b); zebularine (20 μmol/l) or DMSO control (c, d, e); P/AON miR-203a (20 μmol/l) or P/AON control (f, g, h). The levels of signaling components, especially, of p-Akt, were increased upon various treatments. e, epithelium; s, stroma. Scale bar, 20 μm.

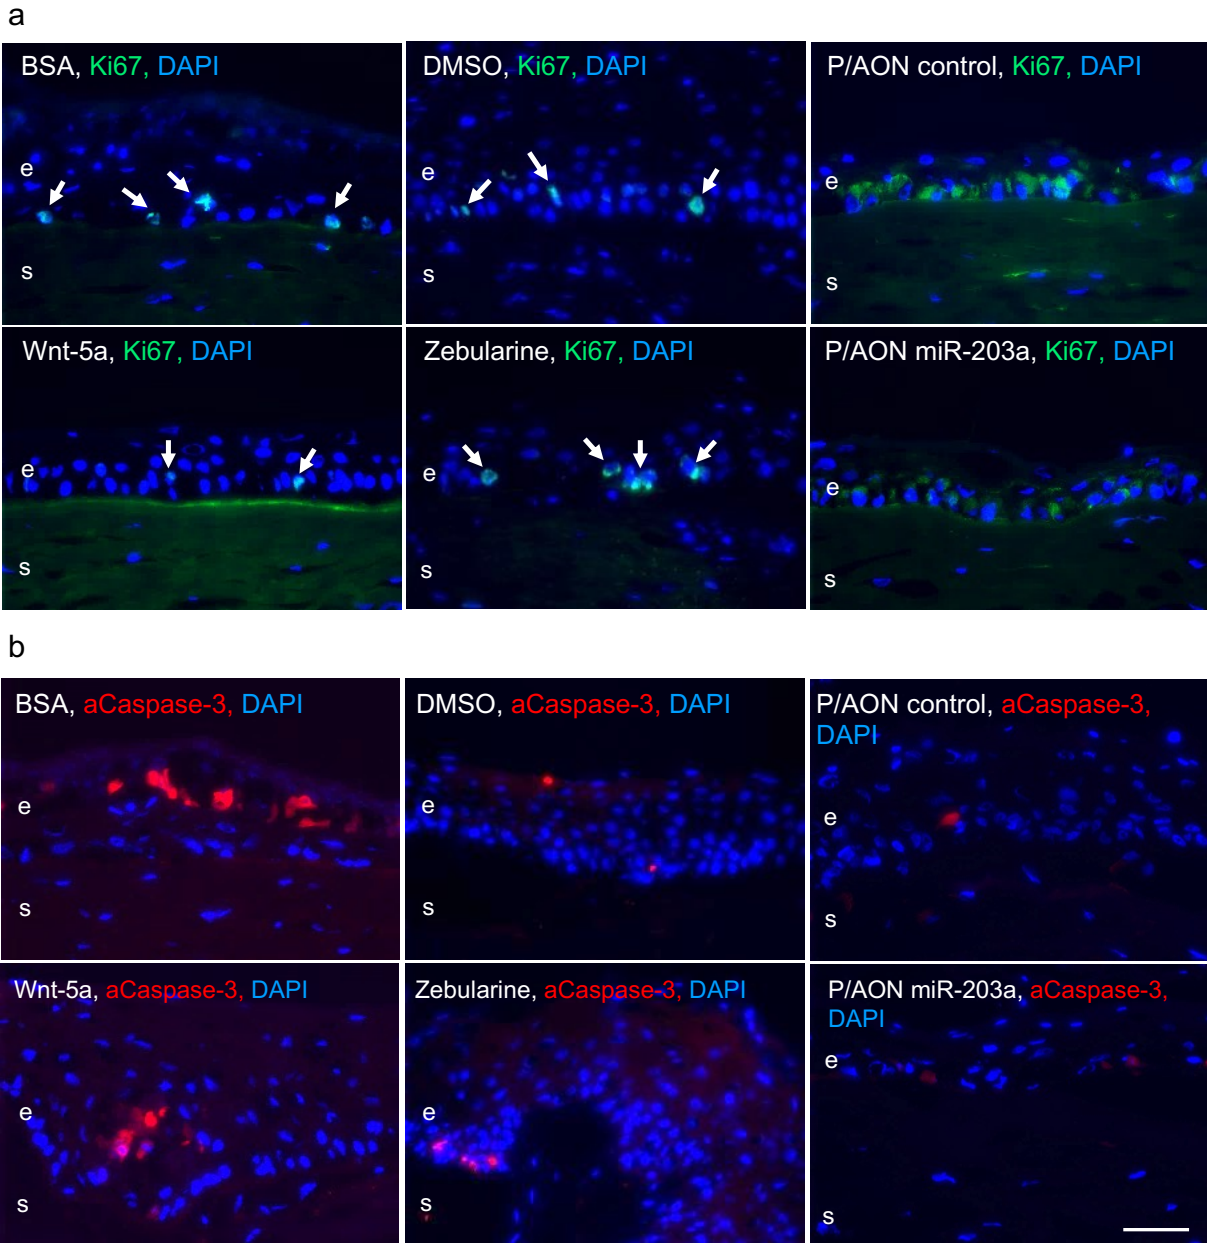

**ESM Figure 5. Proliferation and apoptosis in Wnt-5a-, zebularine-, or NBC-treated diabetic organ-cultured corneas.** Immunostaining of diabetic organ-cultured corneas for nuclear proliferation marker Ki67 (a) or apoptosis marker activated caspase-3 (b) did not reveal any effects of Wnt-5a, zebularine, or NBC vs. respective controls. BSA and Wnt-5a were used at 200 ng/mL, DMSO and zebularine, at 20  $\mu$ mol/l, P/AON control and P/AON miR-203a, at 20  $\mu$ mol/l AON. e, epithelium; s, stroma. Scale bar, 20  $\mu$ m.

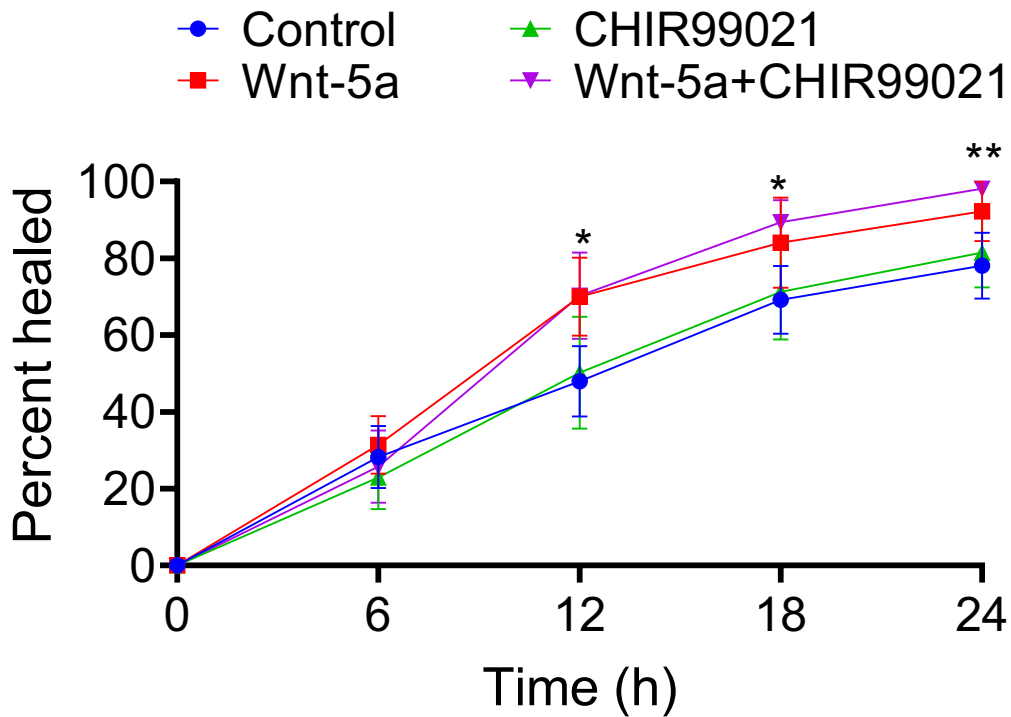

**ESM Figure 6. Wound healing of diabetic LEC with or without Wnt-5a and/or GSK3 $\beta$  inhibitor CHIR99021.** Wnt-5a was used at 200 ng/mL and GSK3 $\beta$  inhibitor (canonical Wnt signaling activator) at 5  $\mu$ mol/l. The inhibitor did not have a significant effect, suggesting minor involvement of canonical Wnt signaling in Wnt-5a effects and baseline wound healing. Values are mean  $\pm$  SEM. \*,  $p < 0.05$ ; \*\*  $p < 0.01$  vs. control at the same time point. Paired  $t$ -test. Number of independent cases  $n = 3$ .

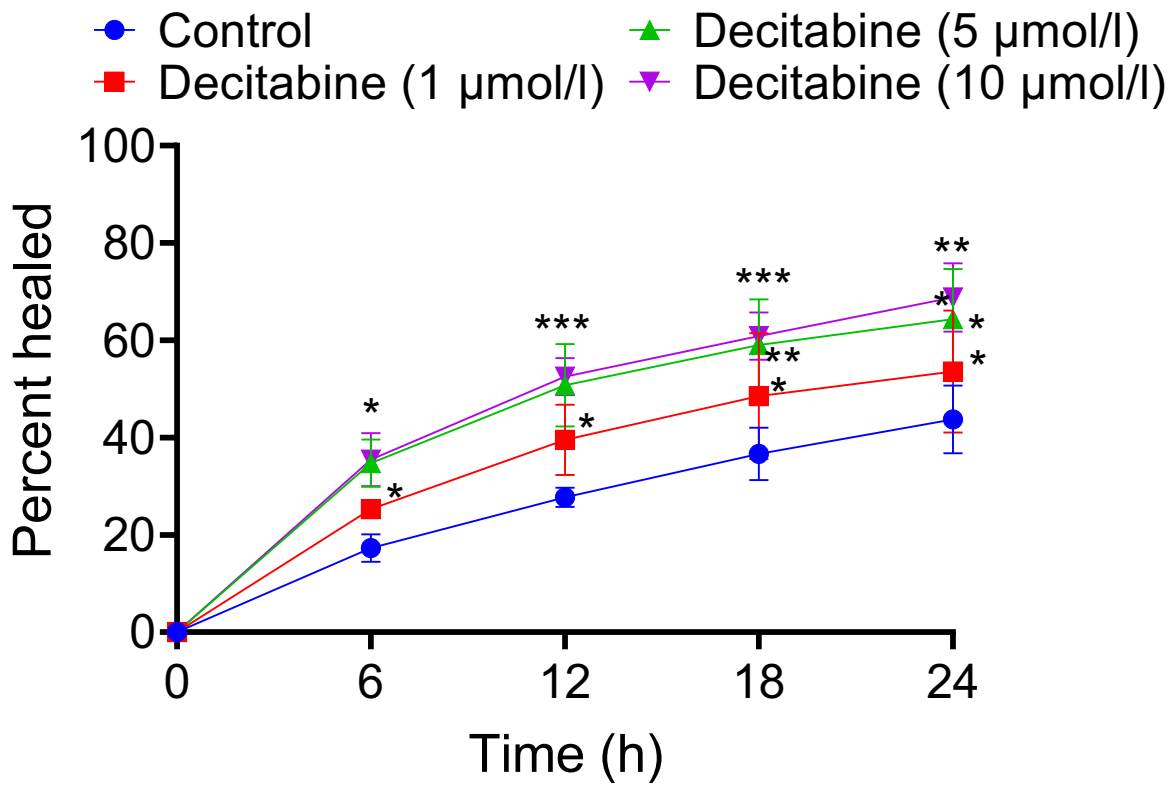

**ESM Figure 7. Dose-dependent stimulation of scratch wound healing in diabetic LEC by Decitabine.** Values are mean  $\pm$  SEM. \*,  $p < 0.05$ ; \*\*,  $p < 0.01$ ; \*\*\*,  $p < 0.001$  vs. control at the same time point. Paired  $t$ -test. Number of independent cases  $n=3$ .

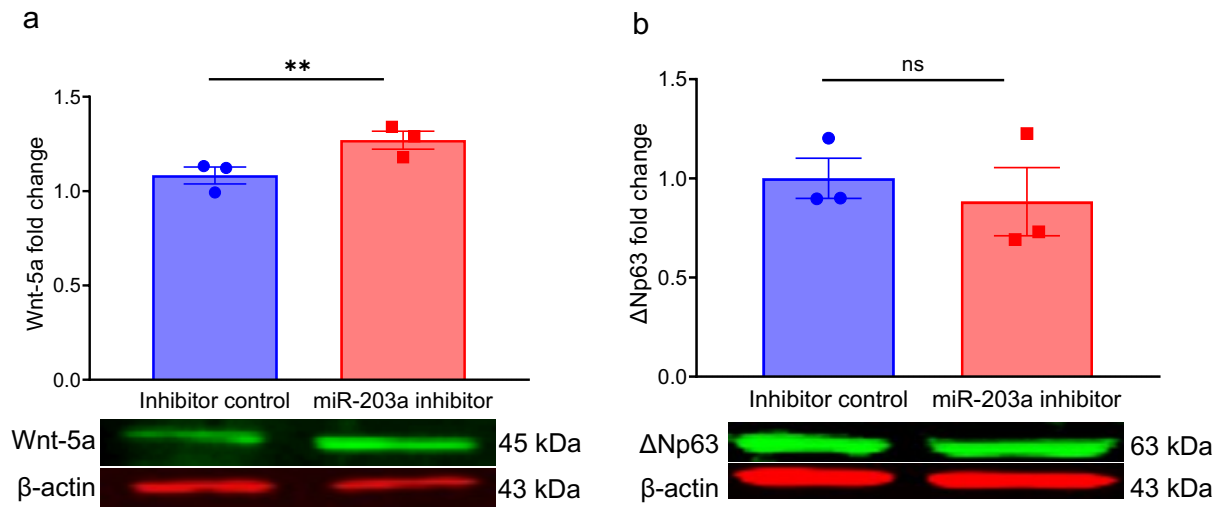

**ESM Figure 8. Protein levels of Wnt-5a and ΔNp63 in diabetic LEC transfected with miR-203a inhibitor and inhibitor control.** (a) Wnt-5a and (b) ΔNp63 proteins in diabetic LEC transfected with miR-203a inhibitor and inhibitor control. miR-203a inhibitor caused increase of Wnt-5a but not of ΔNp63. Values are mean ± SEM. \*,  $p=0.05$  vs. control. Paired  $t$ -test. Number of independent cases  $n=3$ . Control value is taken as 1.
